# Supplementary material for: Antimicrobial and anticancer properties of carbon monoxide releasing molecules of the fac-[Re(CO)3(N–N)L]+ family
Source: Royal Society of Chemistry journal article supplement (doi:10.1039/d4dt00978a), 2024-01-01
Supplement: d4dt00978a1.pdf [file d4dt00978a1.pdf]

## Supplementary Information

### Antimicrobial and anticancer properties of Carbon Monoxide Releasing Molecules of the *fac*-[Re(CO)<sub>3</sub>(N-N)L]<sup>+</sup> family

Carlos C. Romão\*, Sofia S. Mendes, Cátia Rebelo, Sandra M. Carvalho, and Lígia M. Saraiva

Instituto de Tecnologia Química e Biológica António Xavier, Universidade Nova de Lisboa, Avenida da República (EAN), 2780-157 Oeiras, Portugal

\*Corresponding author

Carlos C. Romão

Instituto de Tecnologia Química e Biológica António Xavier, Universidade Nova de Lisboa, Avenida da República (EAN), 2780-157 Oeiras, Portugal

[ccr@itqb.unl.pt](mailto:ccr@itqb.unl.pt)

### Table of Contents

#### FTIR Spectra

| Compound Name (KBr pellet)                                        | Page |
|-------------------------------------------------------------------|------|
| <i>fac</i> -[Re(CO) <sub>3</sub> (bpy)(1-tritylimidazole)]OTf     | 2    |
| <i>fac</i> -[Re(CO) <sub>3</sub> (1-diphenylmethylimidazole)]OTf  | 3    |
| <i>fac</i> -[Re(CO) <sub>3</sub> (bpy)(1-benzylimidazole)]OTf     | 4    |
| <i>fac</i> -[Re(CO) <sub>3</sub> (bpy)(1-phenylimidazole)]OTf     | 5    |
| <i>fac</i> -[Re(CO) <sub>3</sub> (bpy)(1-tert-butylimidazole)]OTf | 6    |
| <i>fac</i> -[Re(CO) <sub>3</sub> (bpy)(imidazole)]OTf             | 7    |
| <i>fac</i> -[Re(CO) <sub>3</sub> (bpy)PPh <sub>3</sub> ]OTf       | 8    |
| <i>fac</i> -[Re(CO) <sub>3</sub> (bpy)PCy <sub>3</sub> ]OTf       | 9    |

#### <sup>1</sup>H NMR Spectra

| Compound Name                                                     | Page |
|-------------------------------------------------------------------|------|
| <i>fac</i> -[Re(CO) <sub>3</sub> (bpy)(1-tritylimidazole)]OTf     | 10   |
| <i>fac</i> -[Re(CO) <sub>3</sub> (bpy)(1-benzylimidazole)]OTf     | 11   |
| <i>fac</i> -[Re(CO) <sub>3</sub> (bpy)(1-phenylimidazole)]OTf     | 12   |
| <i>fac</i> -[Re(CO) <sub>3</sub> (bpy)(1-tert-butylimidazole)]OTf | 13   |
| <i>fac</i> -[Re(CO) <sub>3</sub> (1-diphenylmethylimidazole)]OTf  | 14   |
| <i>fac</i> -[Re(CO) <sub>3</sub> (bpy)(imidazole)]OTf             | 15   |
| <i>fac</i> -[Re(CO) <sub>3</sub> (bpy)PPh <sub>3</sub> ]OTf       | 16   |
| <i>fac</i> -[Re(CO) <sub>3</sub> (bpy)PCy <sub>3</sub> ]OTf       | 17   |

#### Figure S1

18

FTIR *fac*-[Re(CO)<sub>3</sub>(bpy)(1-tritylimidazole)]OTf (KBr pellet)

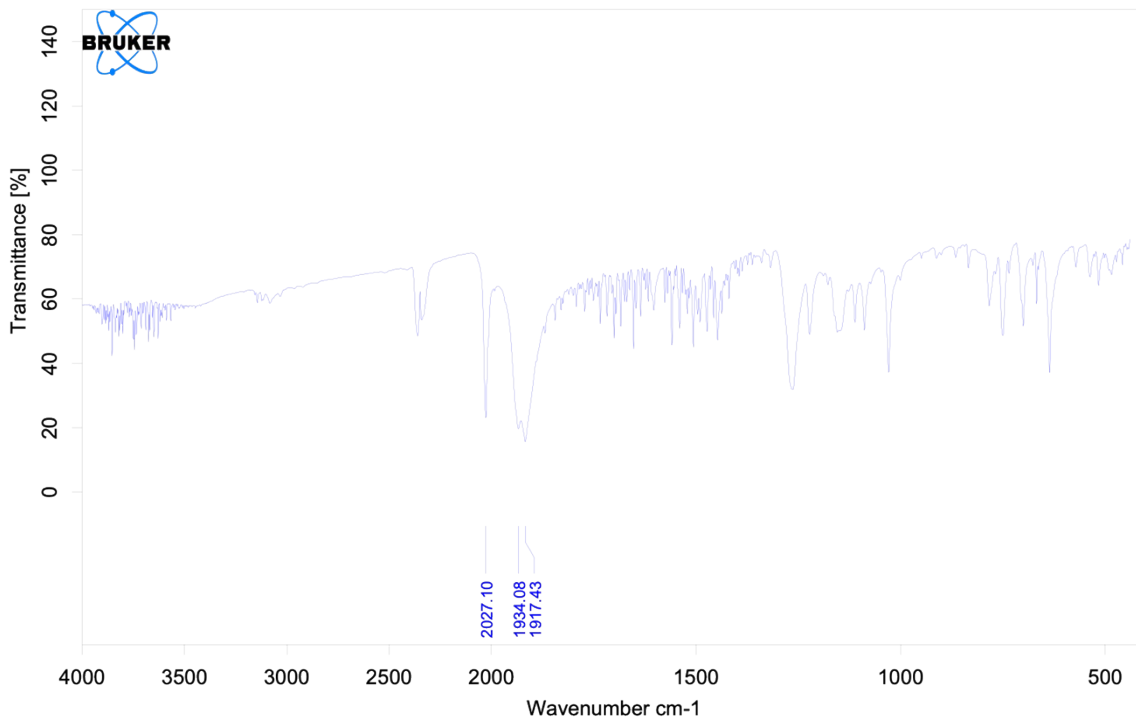

FTIR *fac*-[Re(CO)<sub>3</sub>(1-diphenylmethylimidazole)]OTf (KBr pellet)

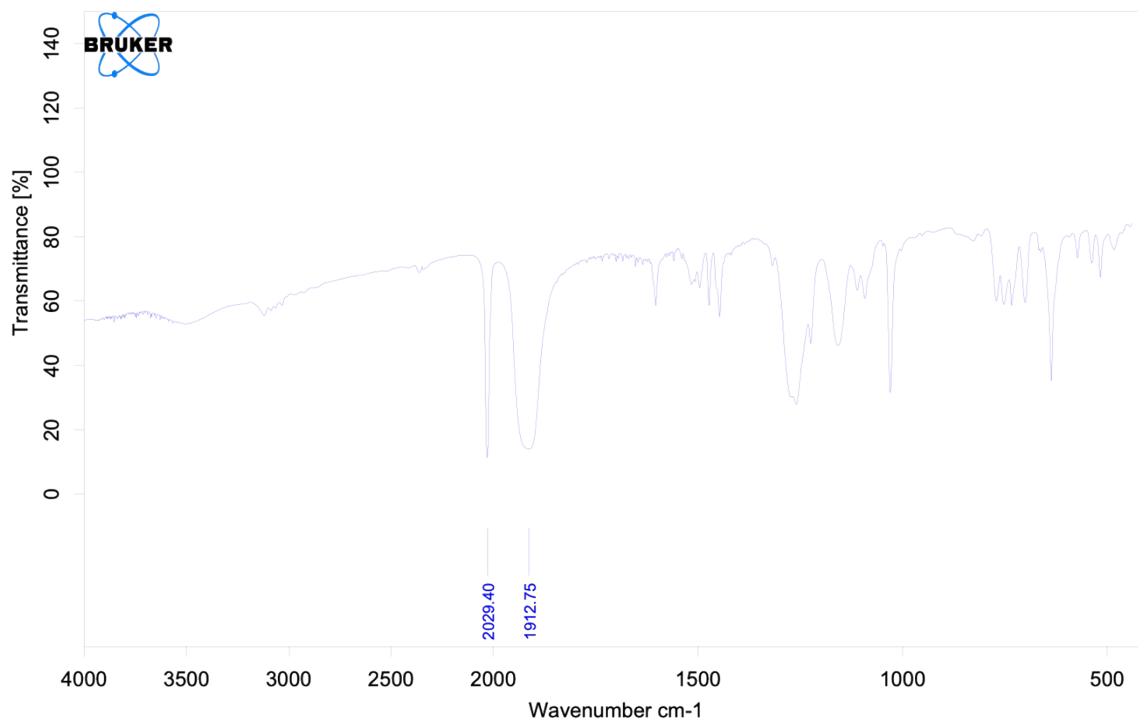

FTIR *fac*-[Re(CO)<sub>3</sub>(bpy)(1-benzylimidazole)]OTf (KBr pellet)

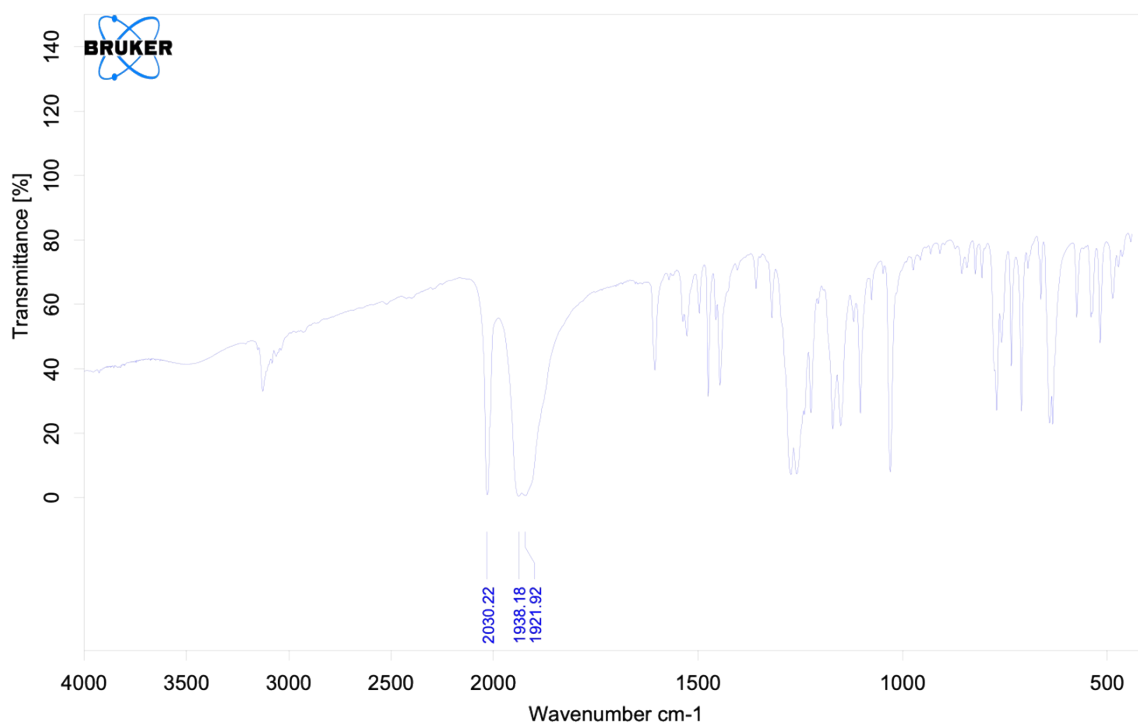

FTIR *fac*-[Re(CO)<sub>3</sub>(bpy)(1-phenylimidazole)]OTf (KBr pellet)

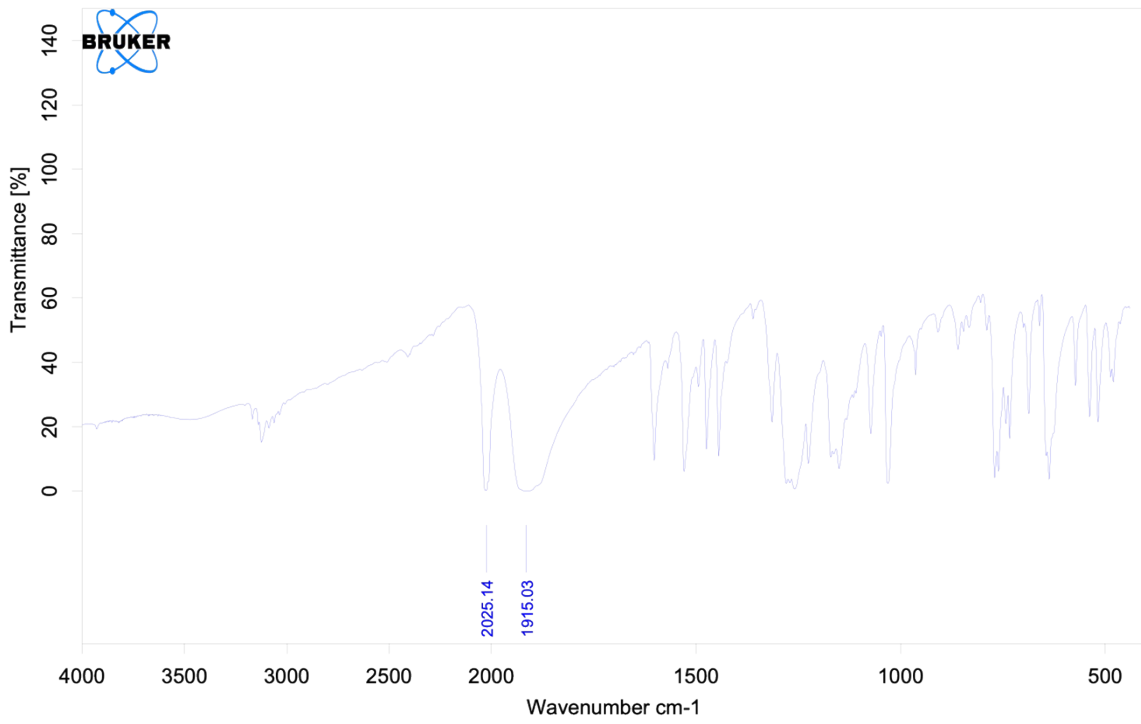

FTIR *fac*-[Re(CO)<sub>3</sub>(bpy)(1-tert-butylimidazole)][OTf] (KBr pellet)

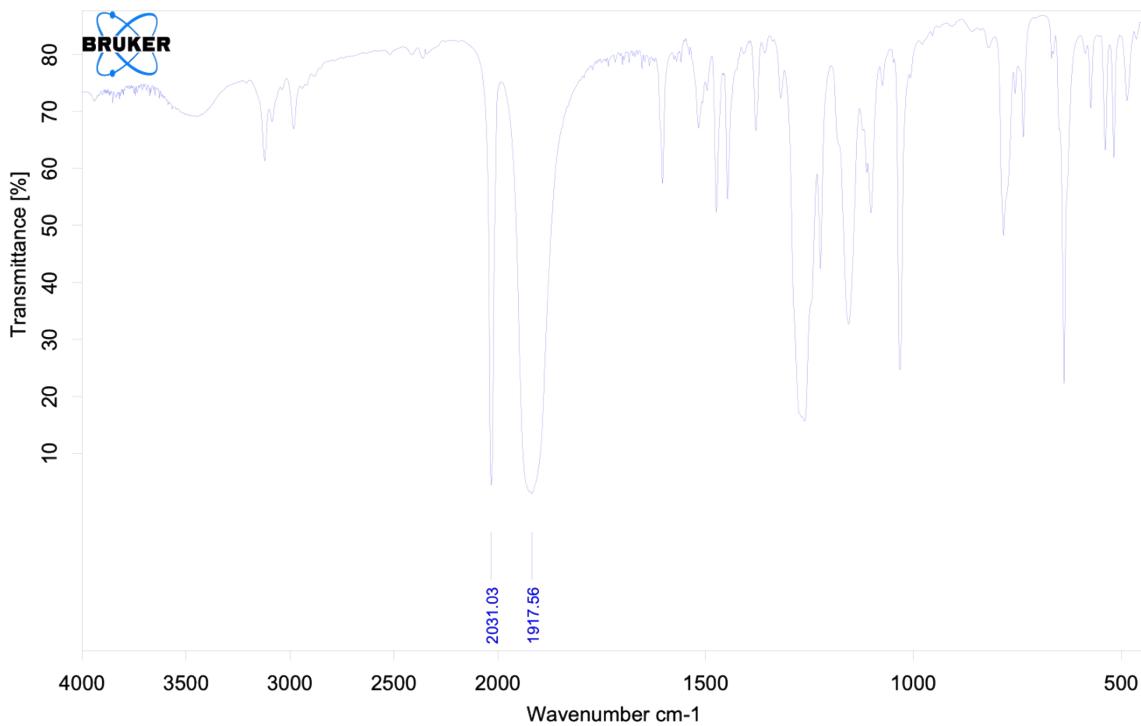

FTIR *fac*-[Re(CO)<sub>3</sub>(bpy)(imidazole)]OTf (KBr pellet)

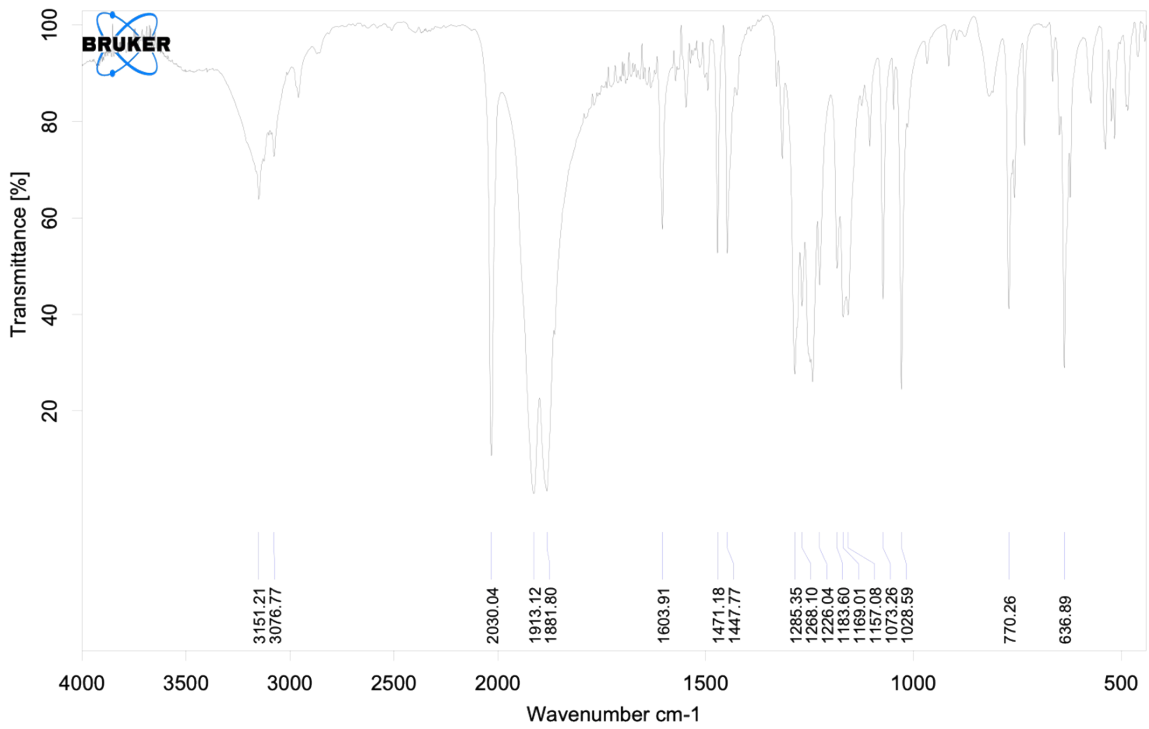

FTIR *fac*-[Re(CO)<sub>3</sub>(bpy)PPh<sub>3</sub>]OTf (KBr pellet)

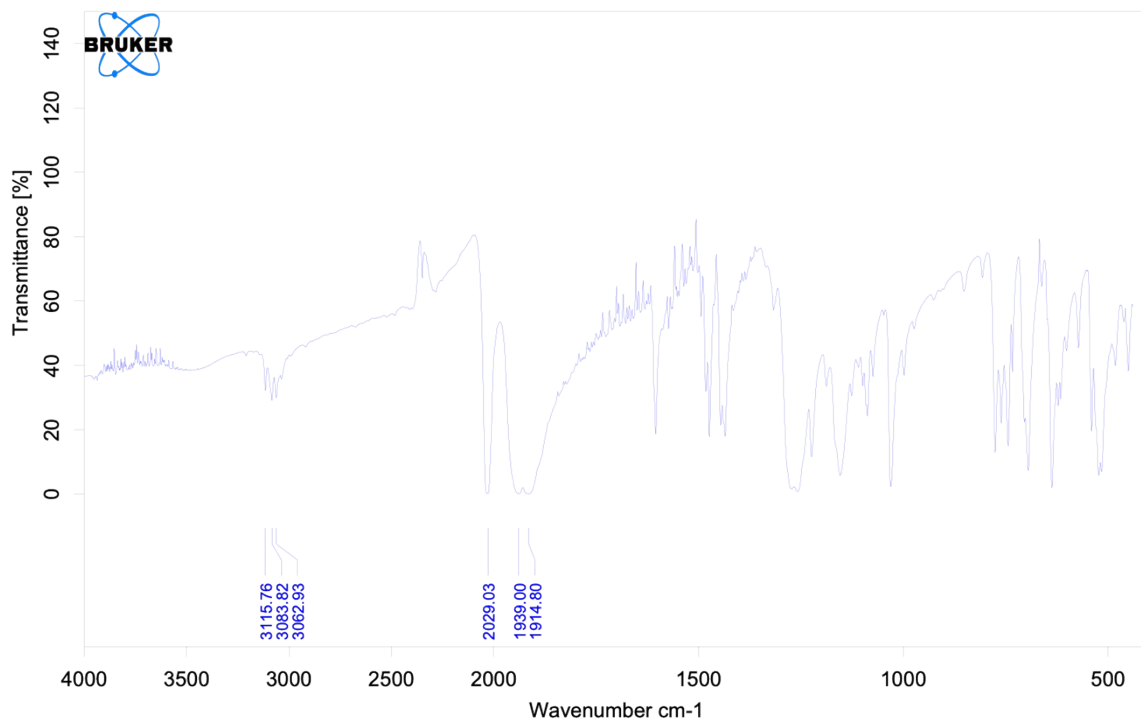



FTIR *fac*-[Re(CO)<sub>3</sub>(bpy)PCy<sub>3</sub>]OTf (KBr pellet)

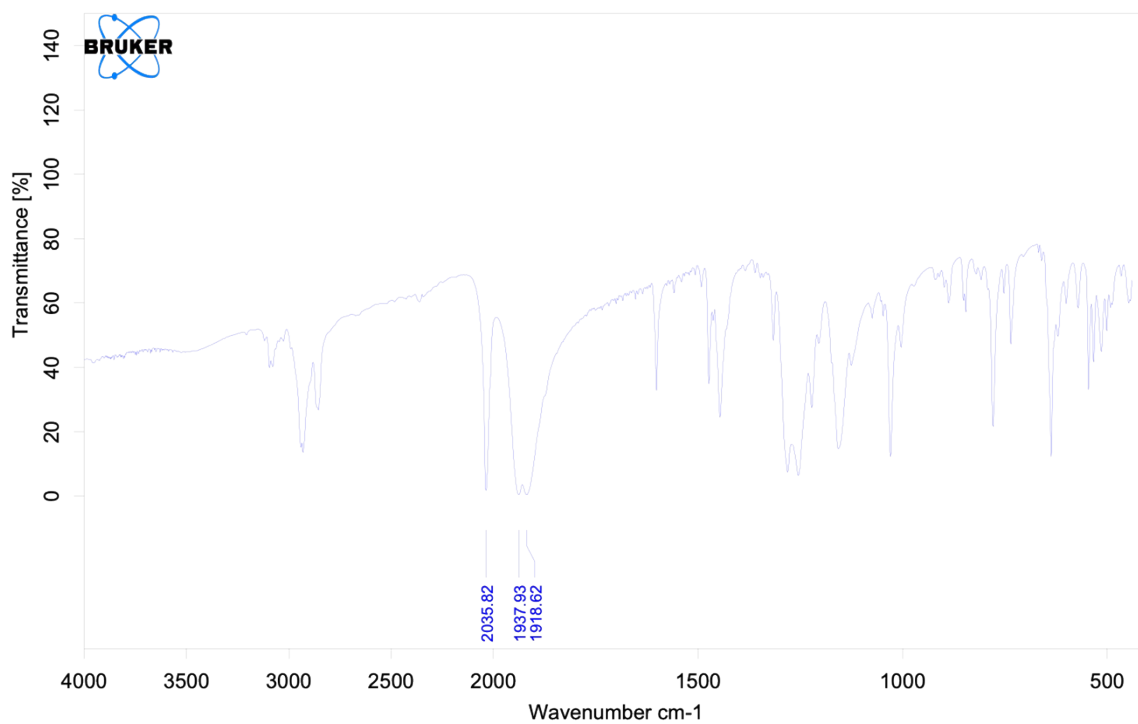

$^1\text{H-NMR}$  *fac*-[Re(CO)<sub>3</sub>(bpy)(1-tritylimidazole)]OTf

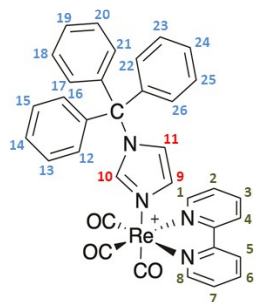

ReBpyTritylIm

Proton assignment

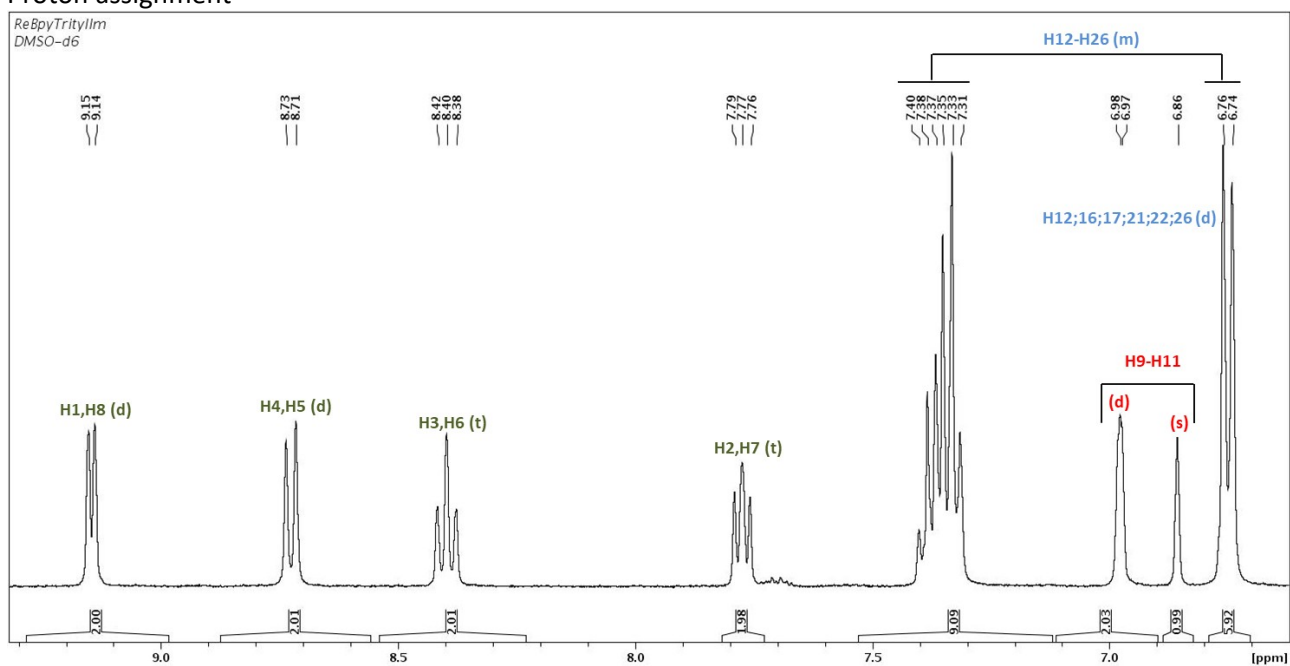

Full spectrum

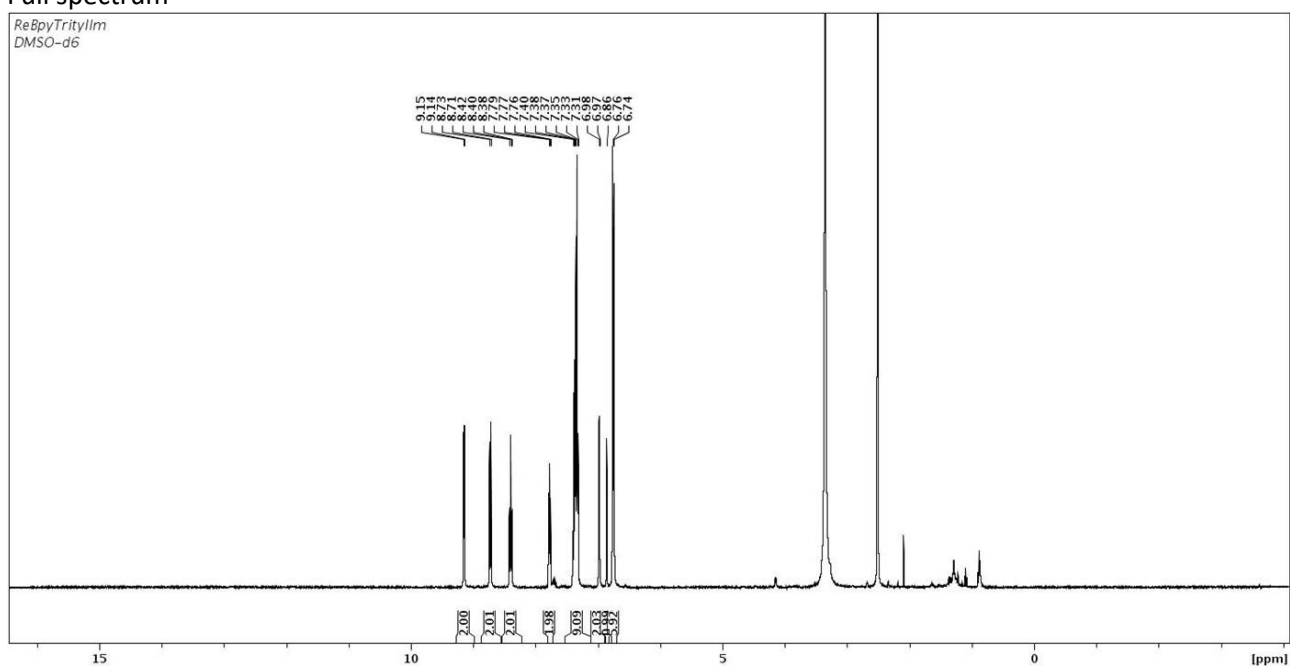

$^1\text{H-NMR}$  *fac*-[Re(CO)<sub>3</sub>(bpy)(1-benzylimidazole)]OTf

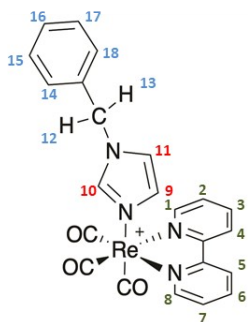

ReBpyBnlm

Proton assignment

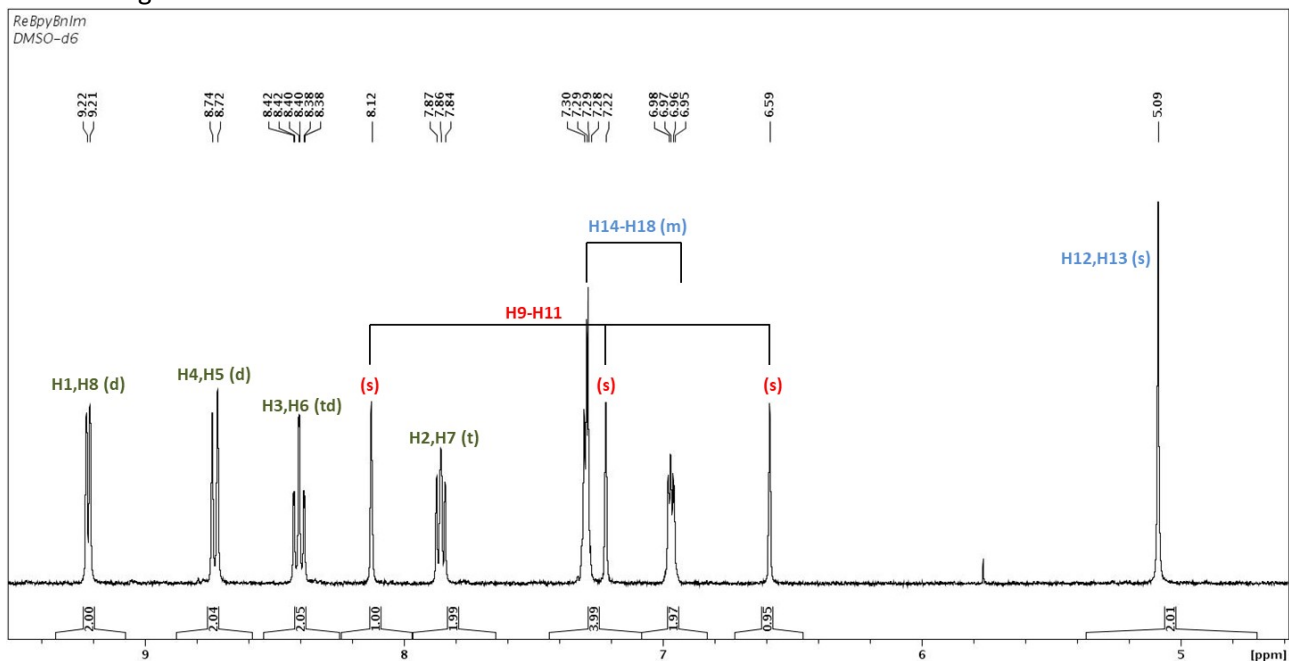

Full spectrum

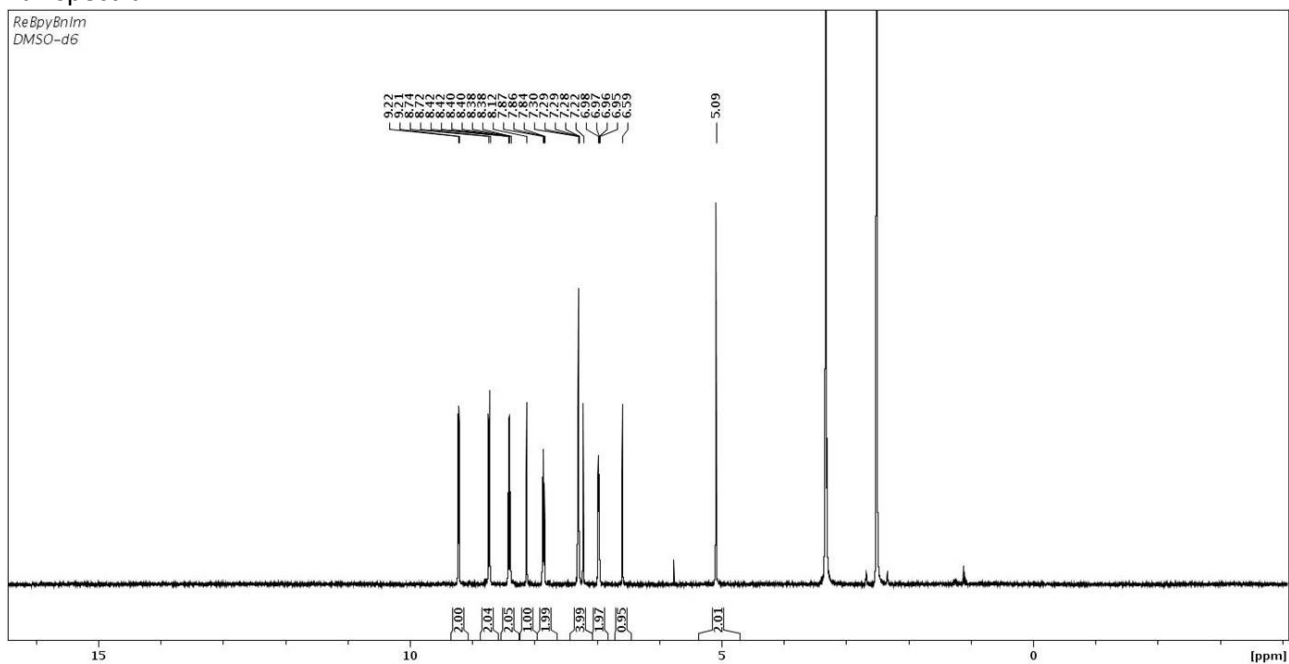



$^1\text{H-NMR}$  *fac*-[Re(CO)<sub>3</sub>(bpy)(1-tert-butylimidazole)]OTf

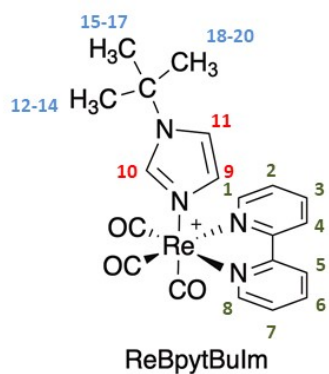

Proton assignment

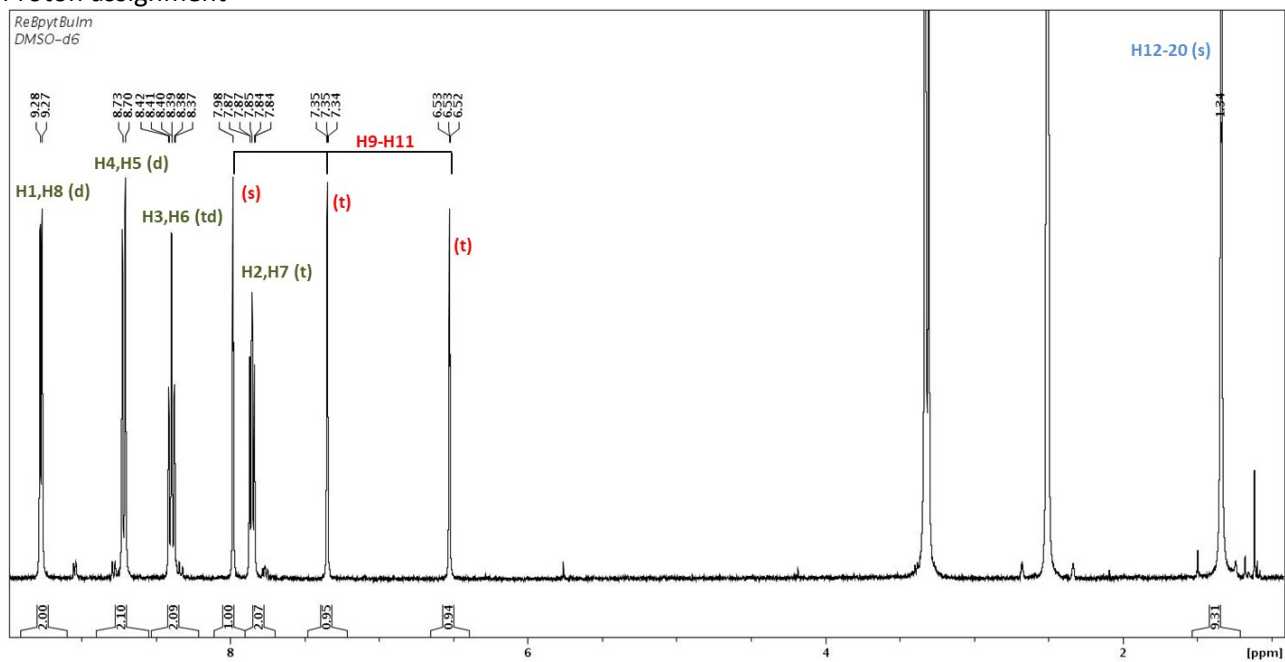

Full spectrum

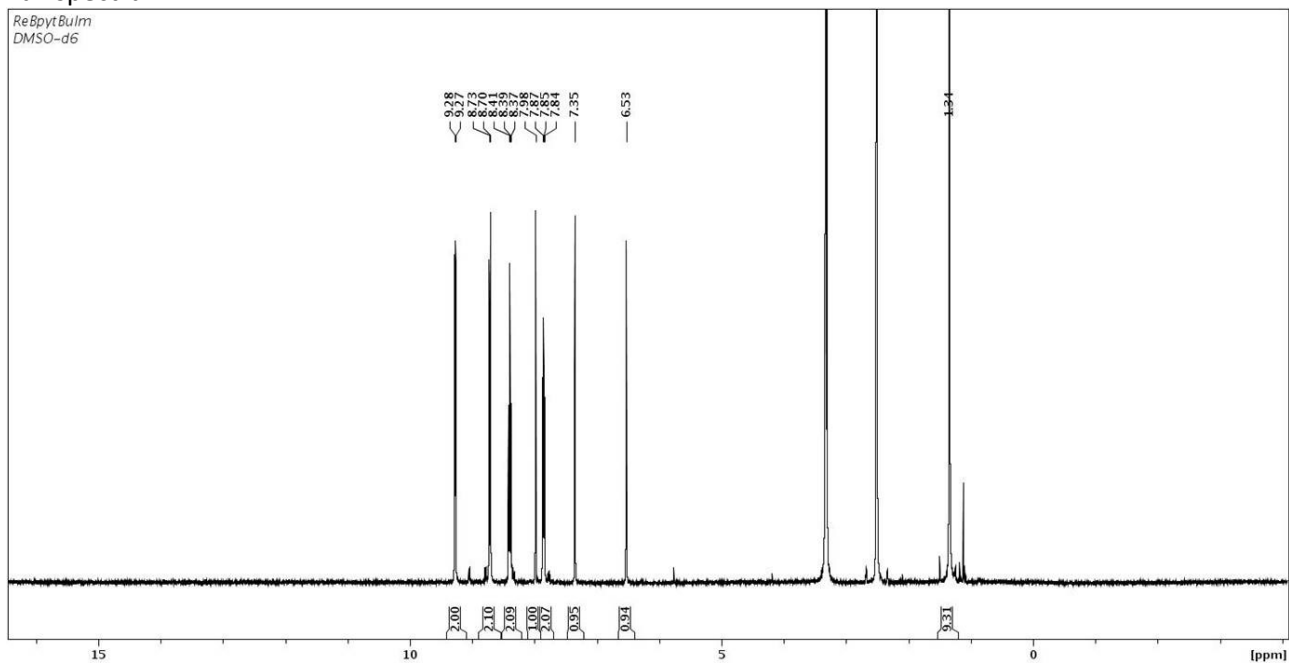

$^1\text{H-NMR}$  *fac*-[Re(CO)<sub>3</sub>(1-diphenylmethylimidazole)]OTf

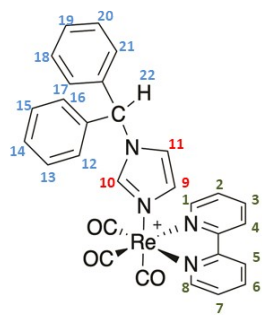

ReBpyPh<sub>2</sub>Im

Proton assignment

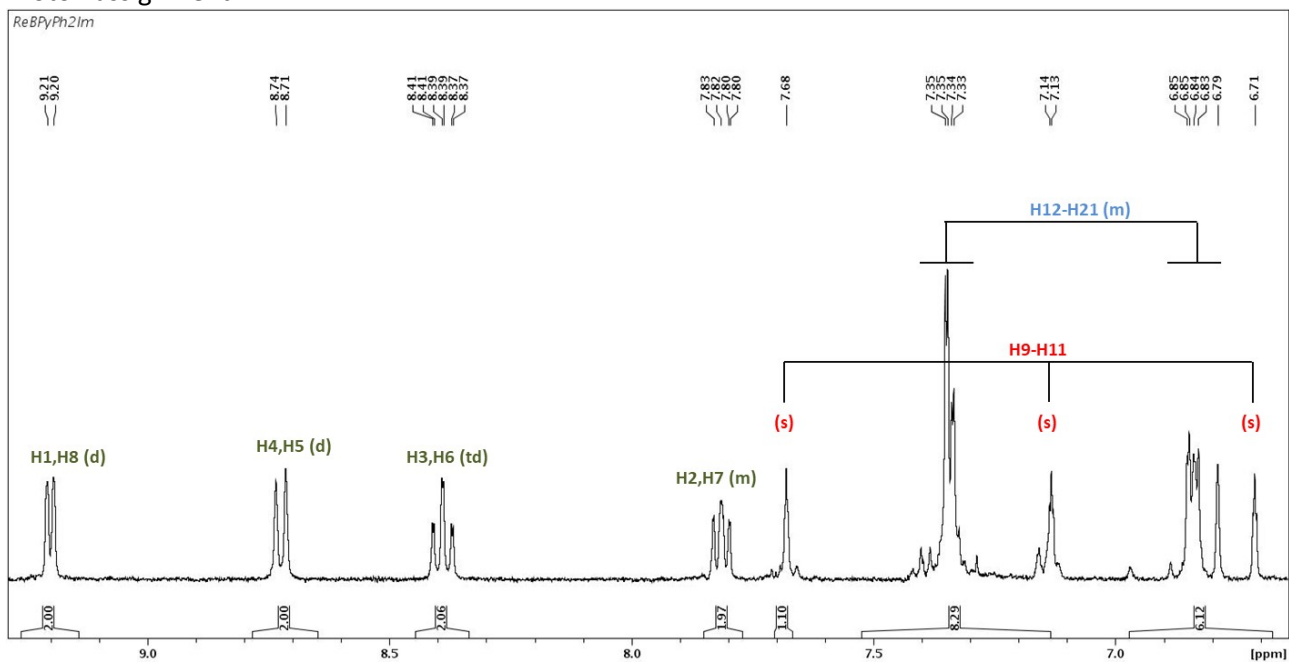

Full spectrum

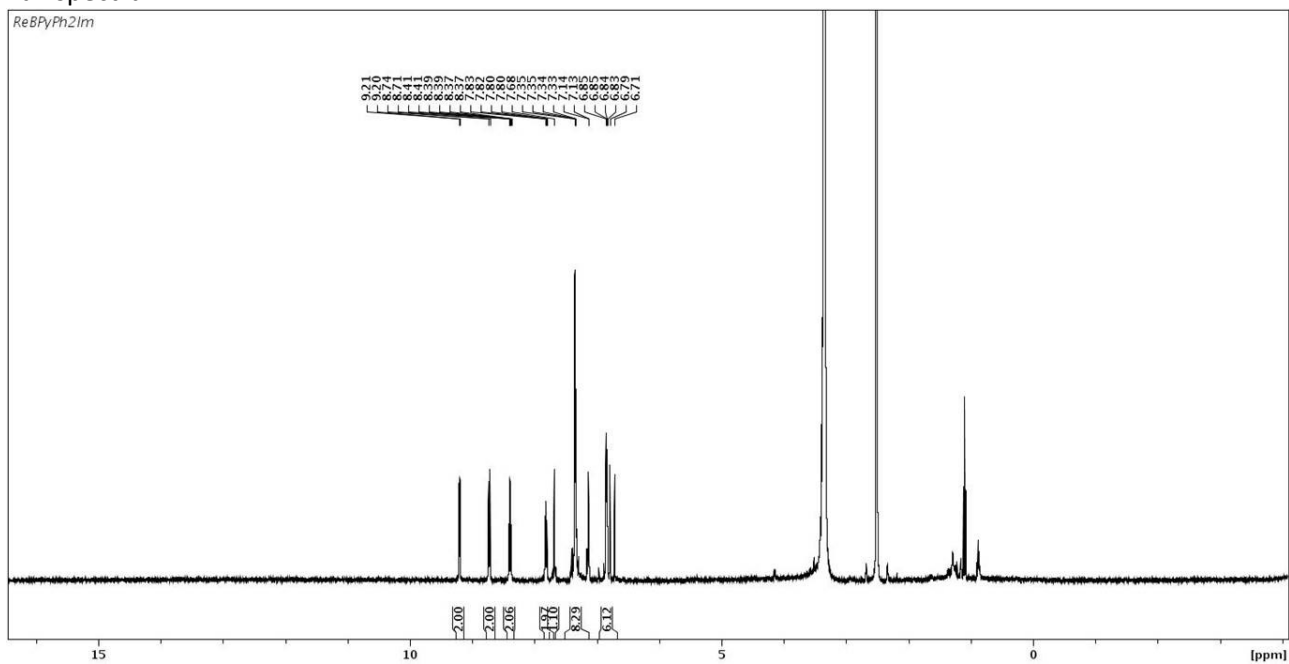

$^1\text{H-NMR}$  *fac*-[Re(CO)<sub>3</sub>(bpy)(imidazole)]OTf

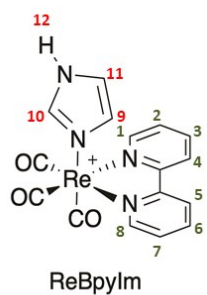

Proton assignment

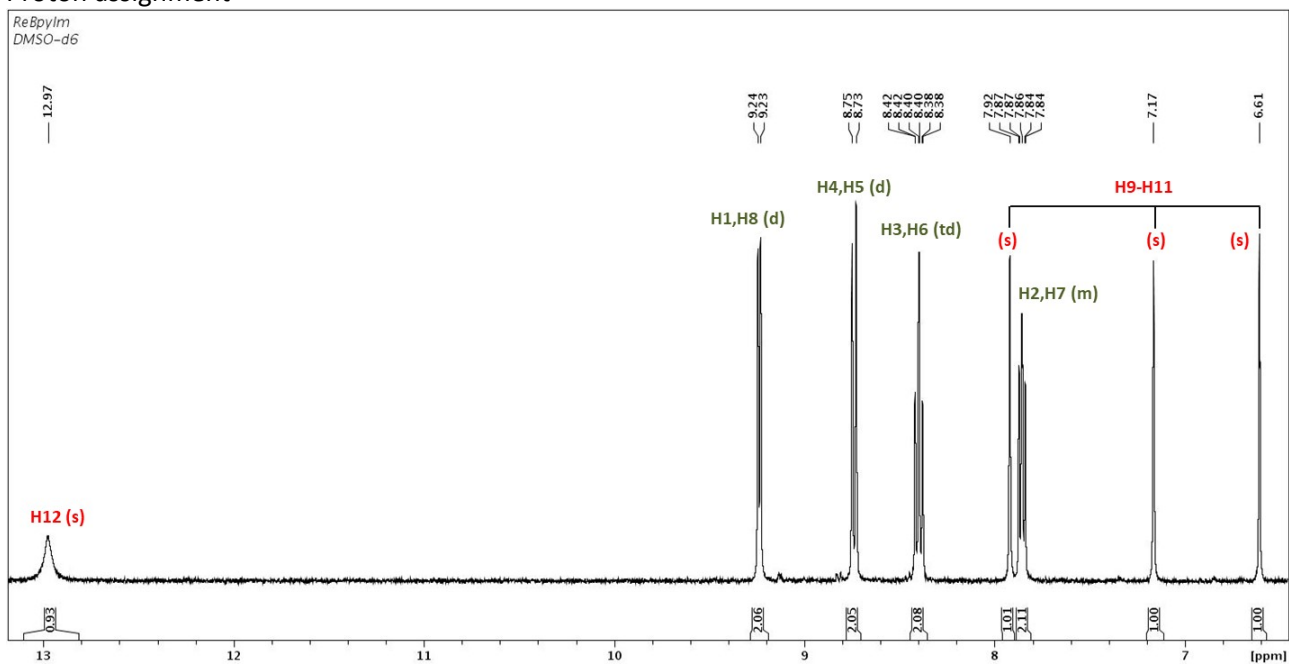

Full spectrum

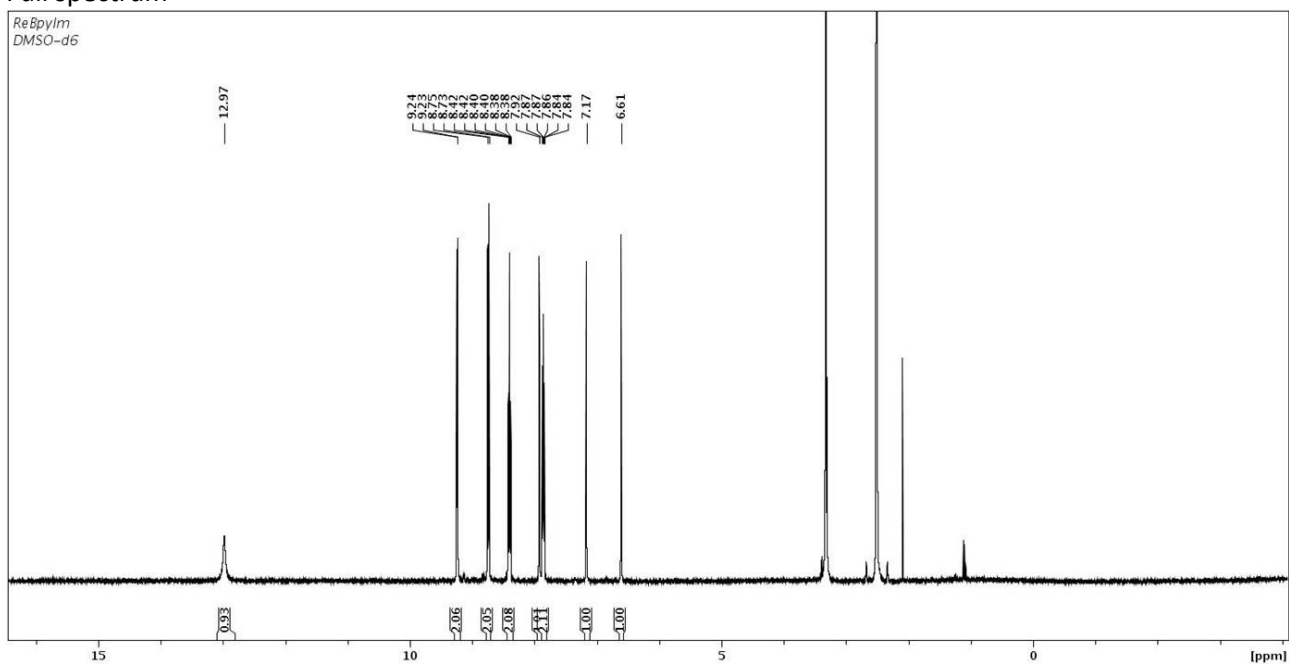

$^1\text{H-NMR}$  *fac*-[Re(CO)<sub>3</sub>(bpy)PPh<sub>3</sub>]OTf

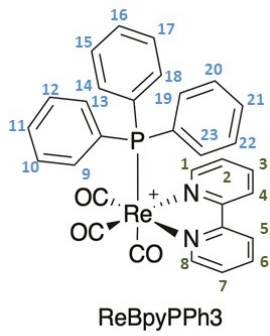

Proton assignment

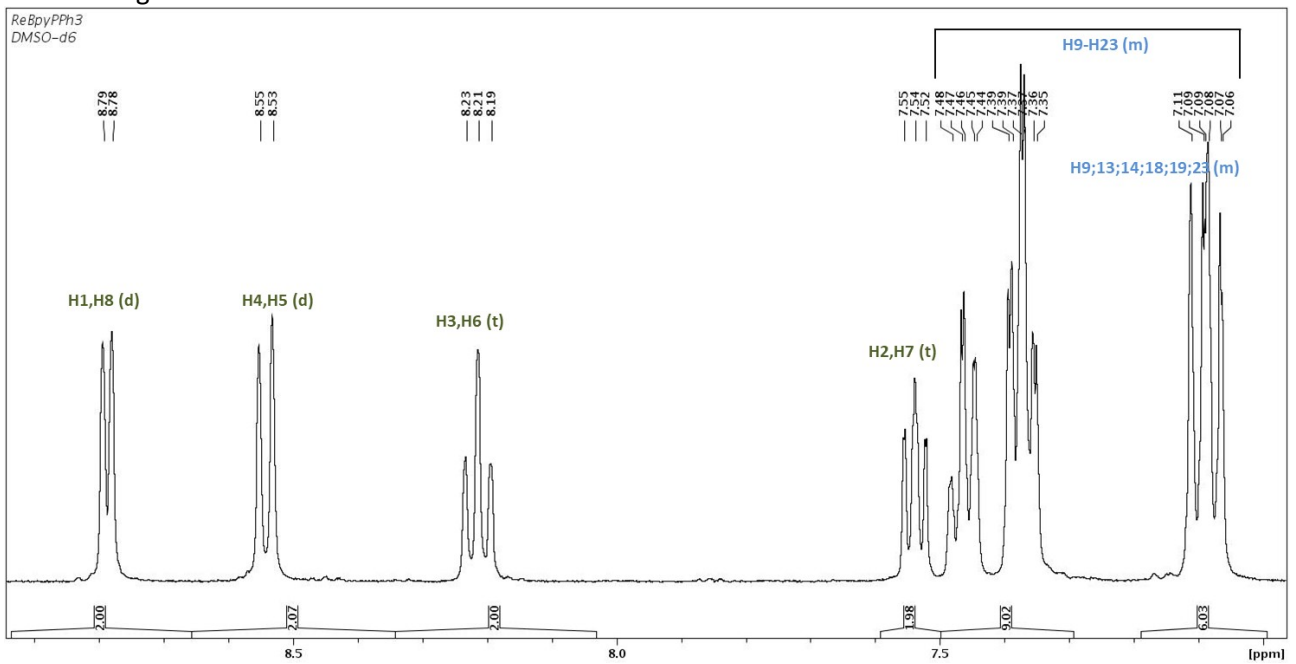

Full spectrum

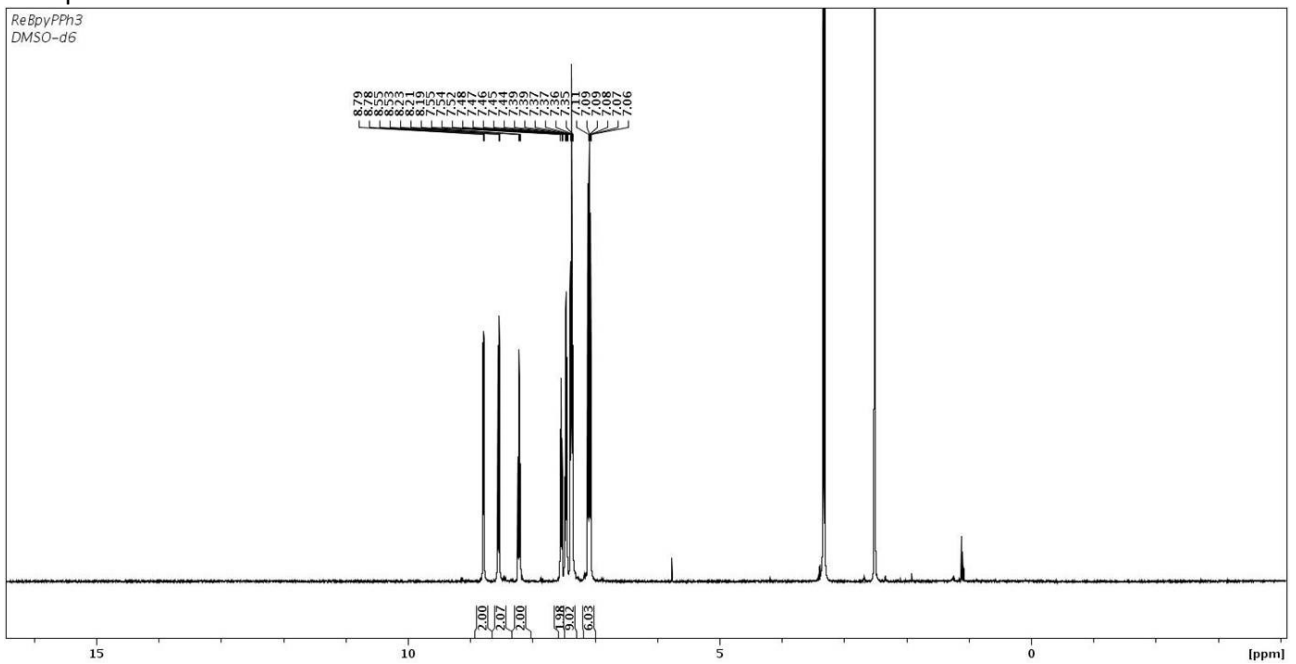



$^1\text{H-NMR}$  *fac*-[Re(CO)<sub>3</sub>(bpy)PCy<sub>3</sub>]OTf

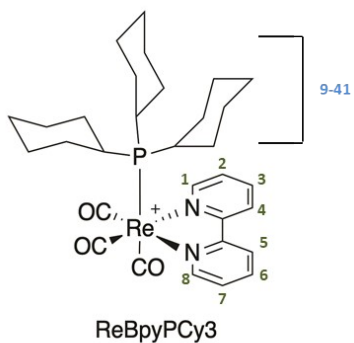

Proton assignment

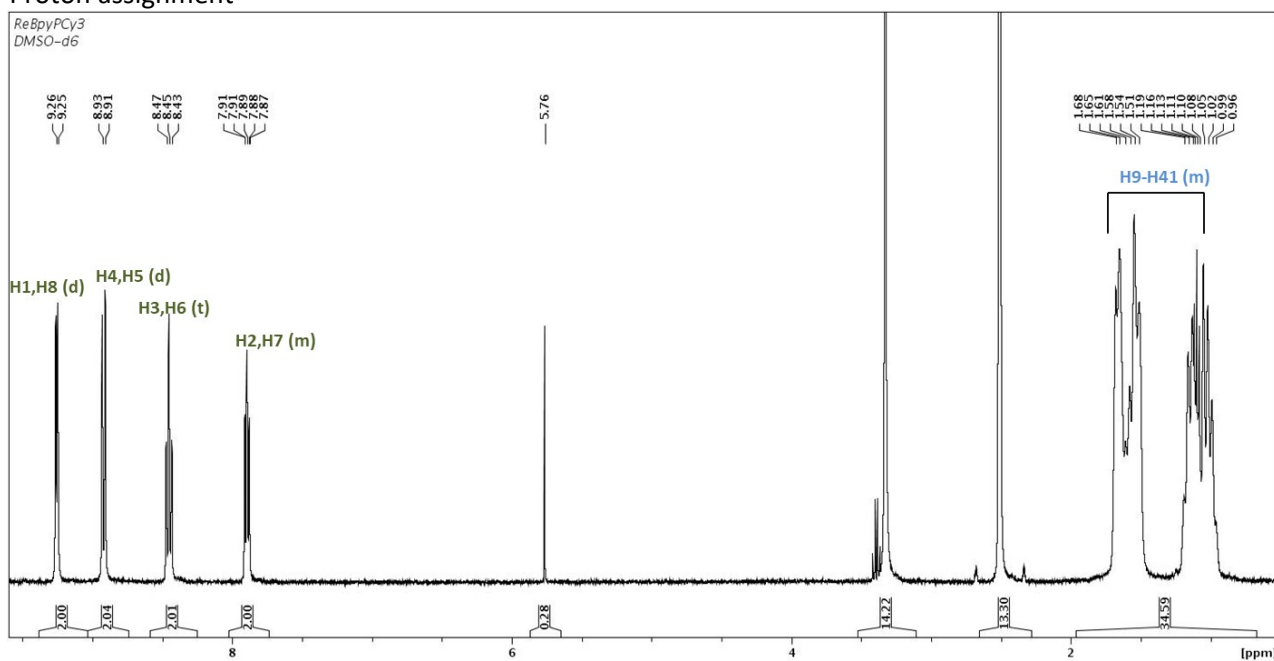

Full spectrum

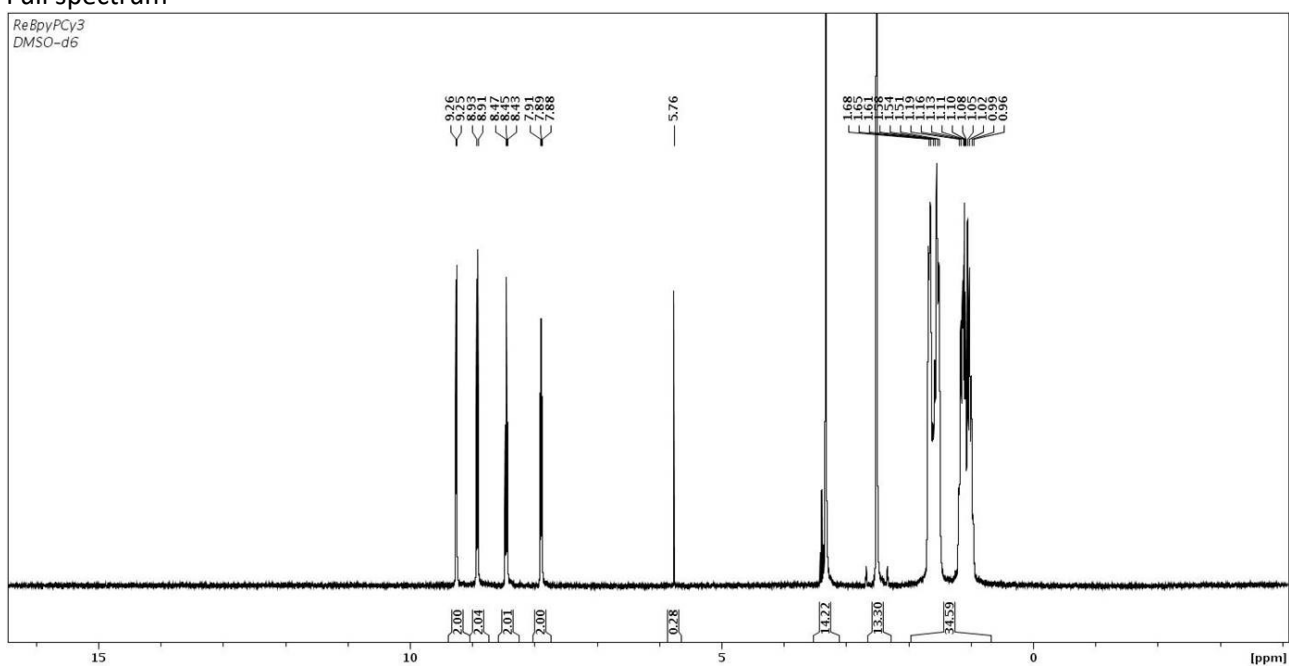

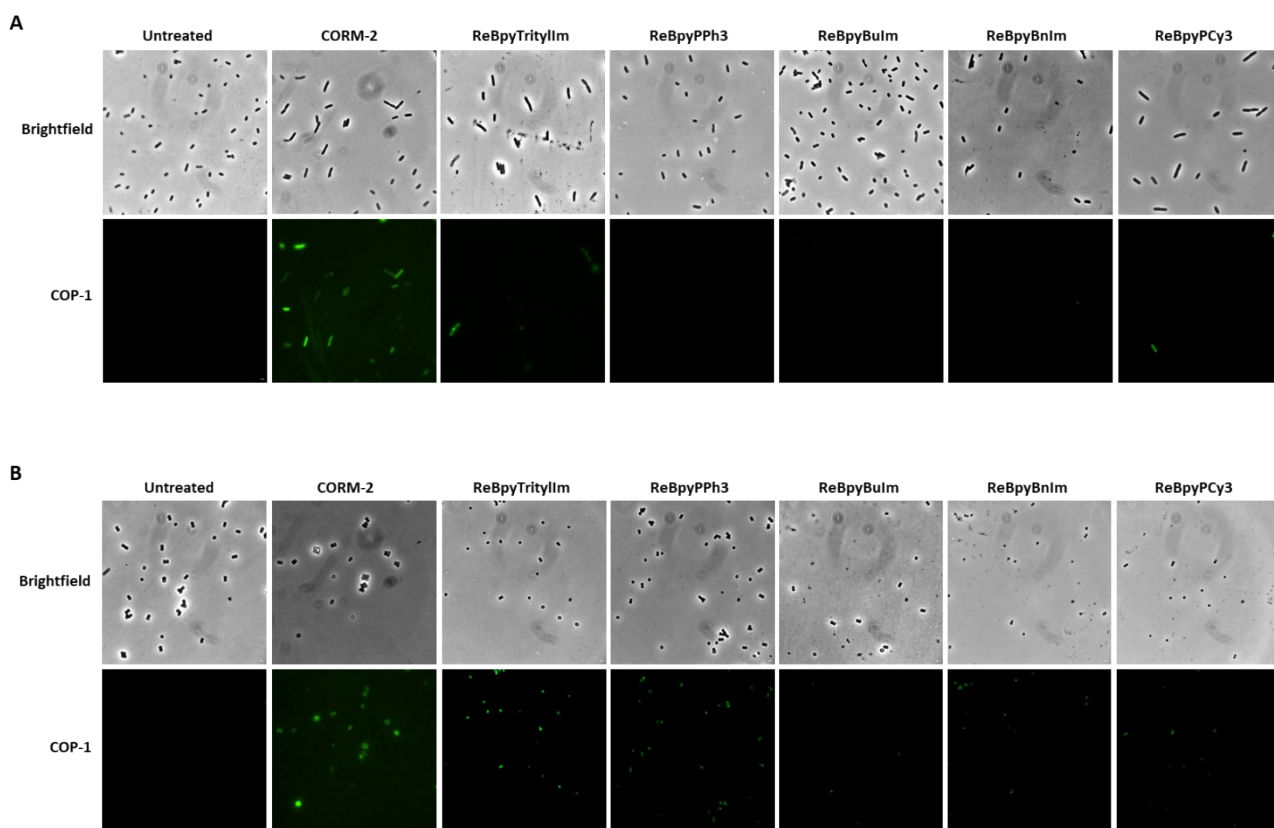

**Figure S1** - Fluorescence microscopy images of *E. coli* (A) and *S. aureus* (B) treated with COP-1. Bacterial cells were left untreated or treated for 15 min with CORMs and exposed to 1  $\mu$ M COP-1. *E. coli* was incubated with the indicated compounds all at 64  $\mu$ g/ml. (B) *S. aureus* was incubated with ReBpyTrityllm, ReBpyPPh3 and ReBpyPCy3 at a concentration of 4  $\mu$ g/ml, and with CORM-2, ReBpyBulm and ReBpyBnlm at 64  $\mu$ g/ml.

Fluorescence images that were acquired with a FITC filter are shown in bottom panels and the correspondent bright-field images are depicted in the upper panels (100x objective).
